# Supplementary figures and images for: Pharmacological evidence for a metabotropic glutamate receptor heterodimer in neuronal cells
Source: eLife journal article supplement (doi:10.7554/elife.25233), 2017-06-29

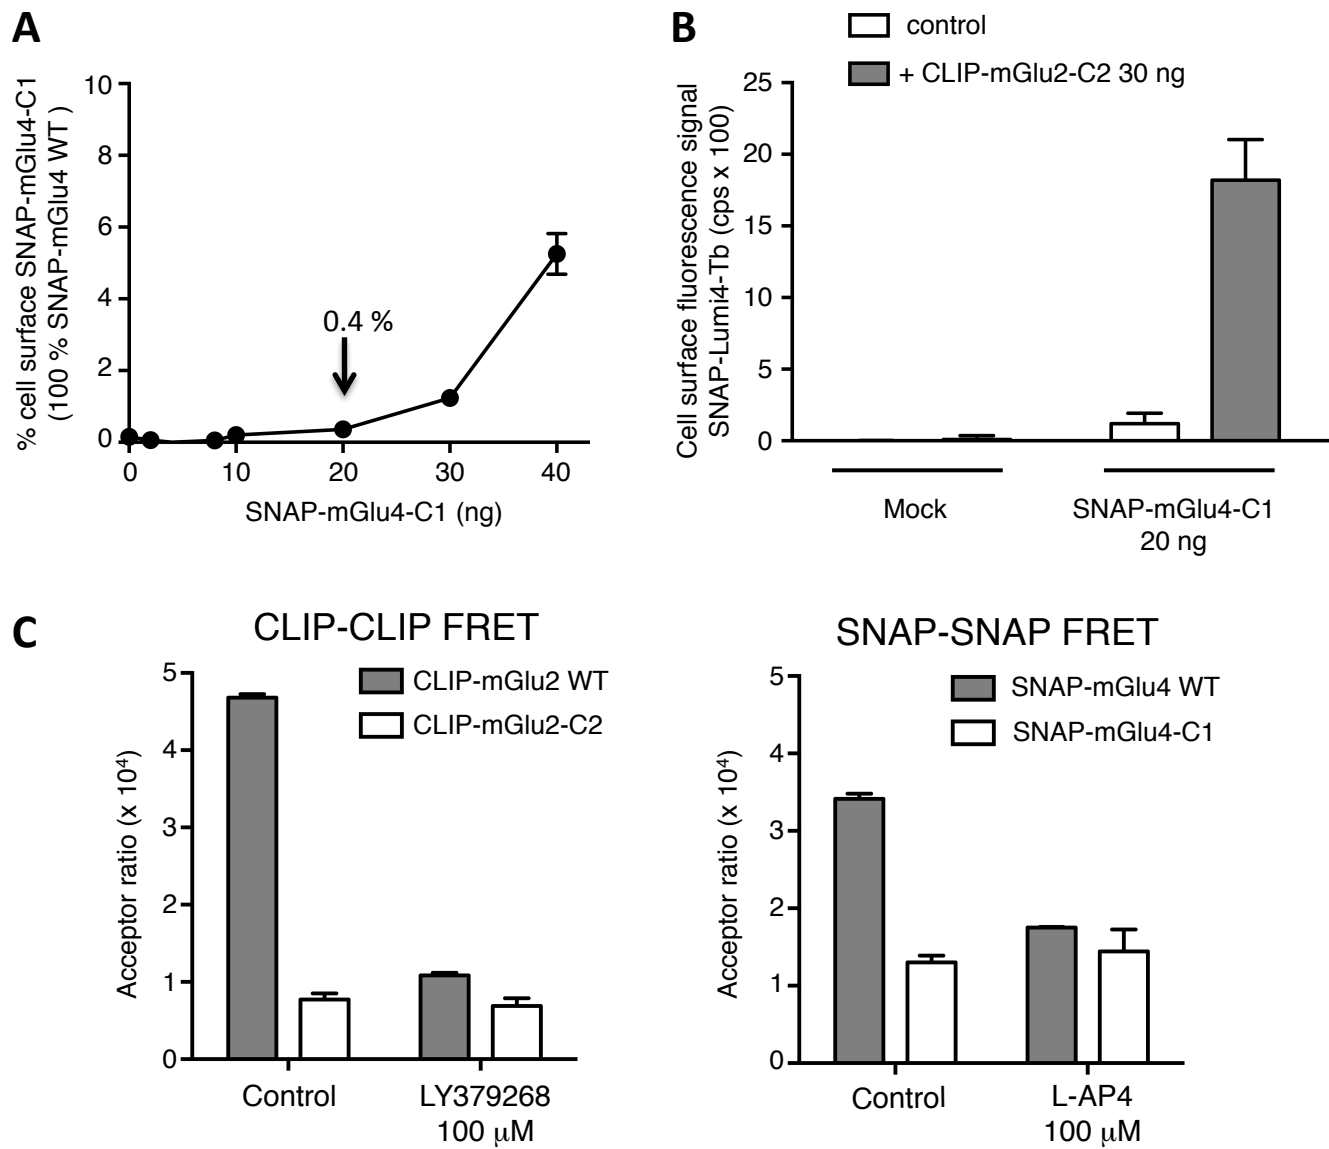

Figure 1-figure supplement 3

Supplement: supp [file elife-25233-supp-v1.zip]

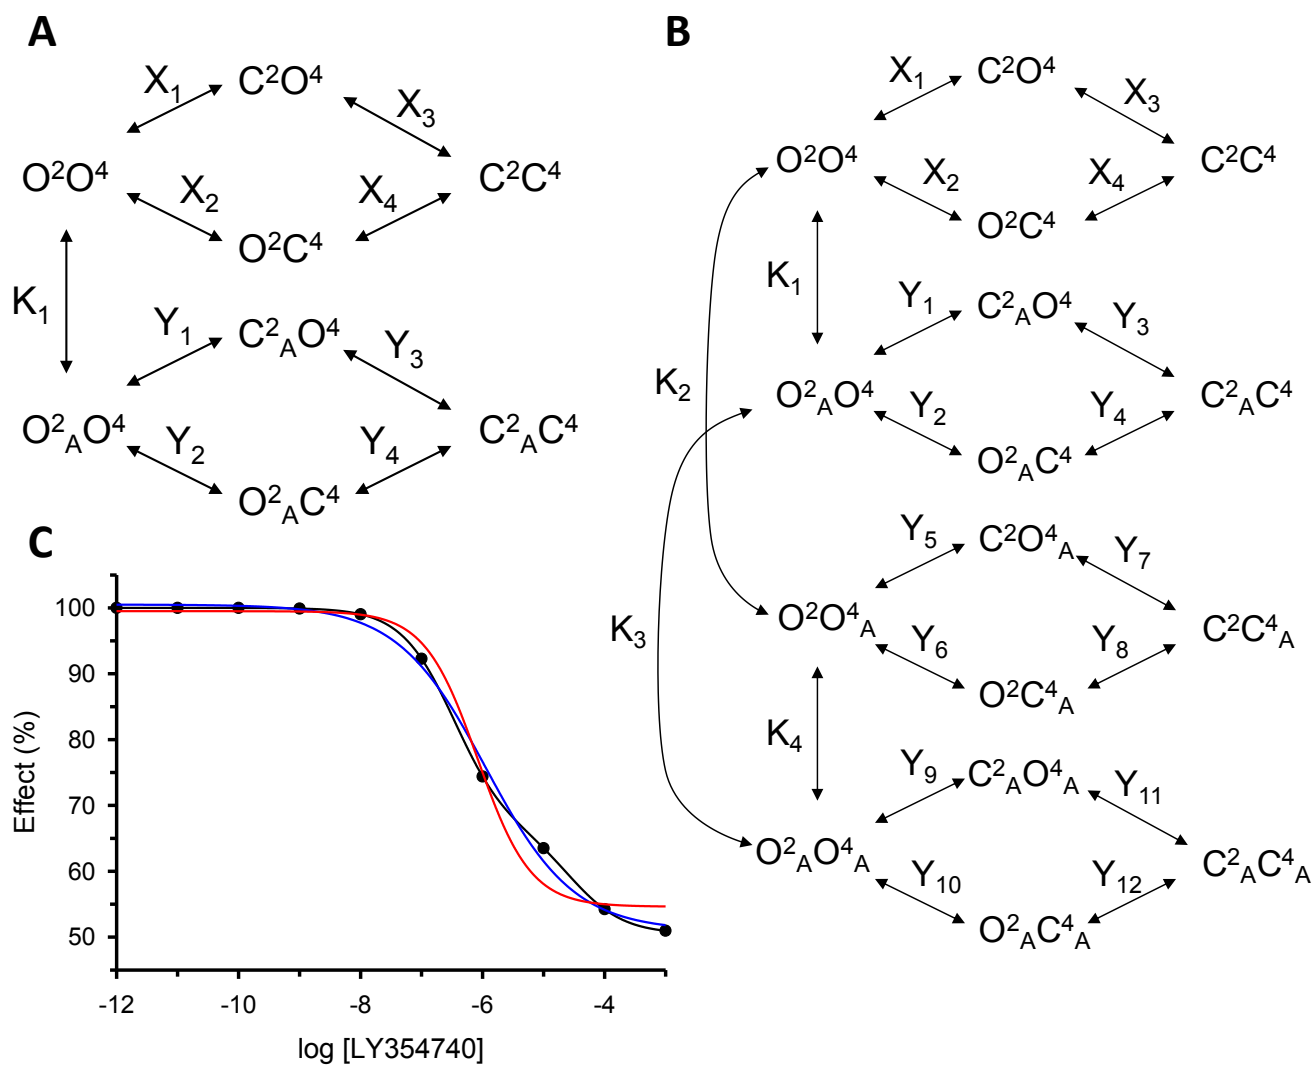

Figure 3-figure supplement 2 .

Supplement: supp [file elife-25233-supp-v1.zip]

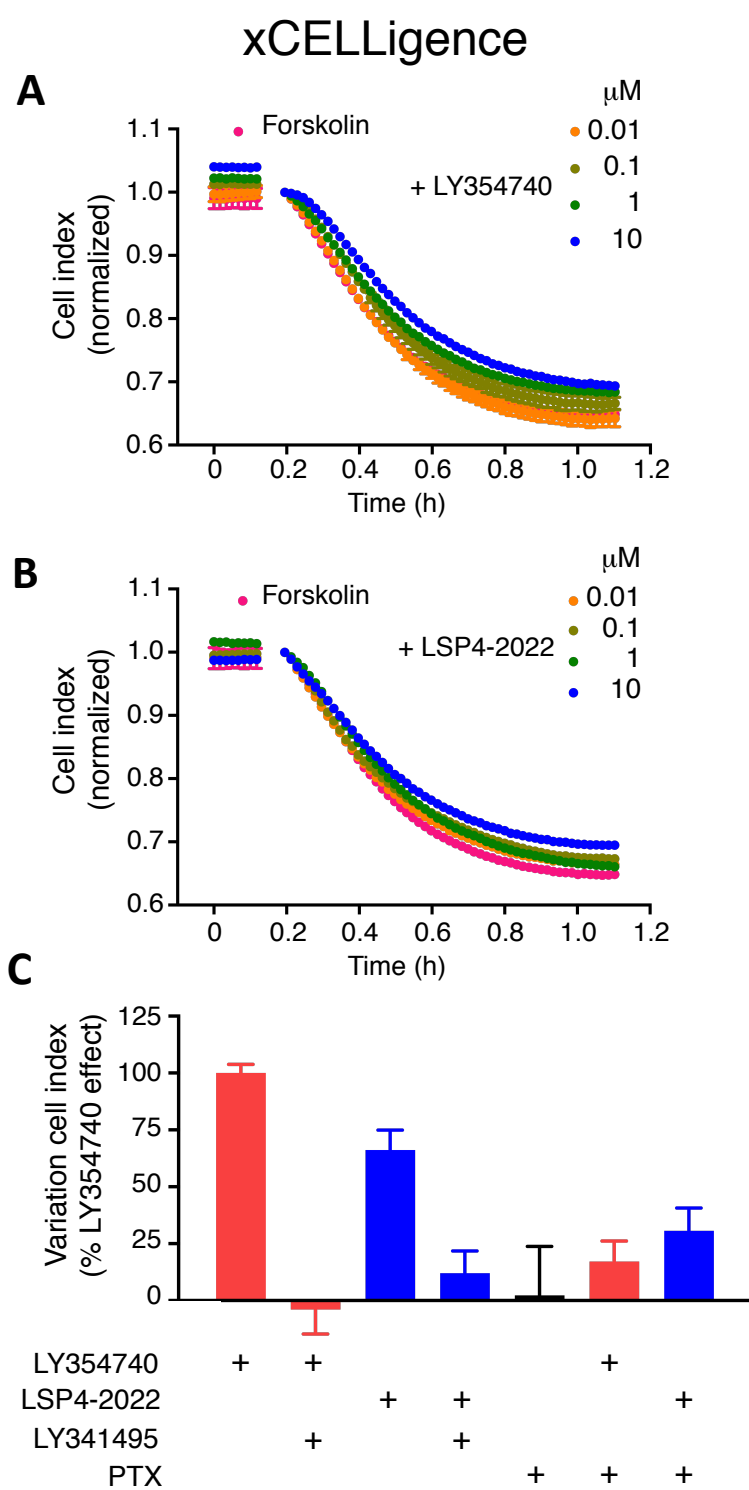

Figure 6-figure supplement 2.

Supplement: supp [file elife-25233-supp-v1.zip]

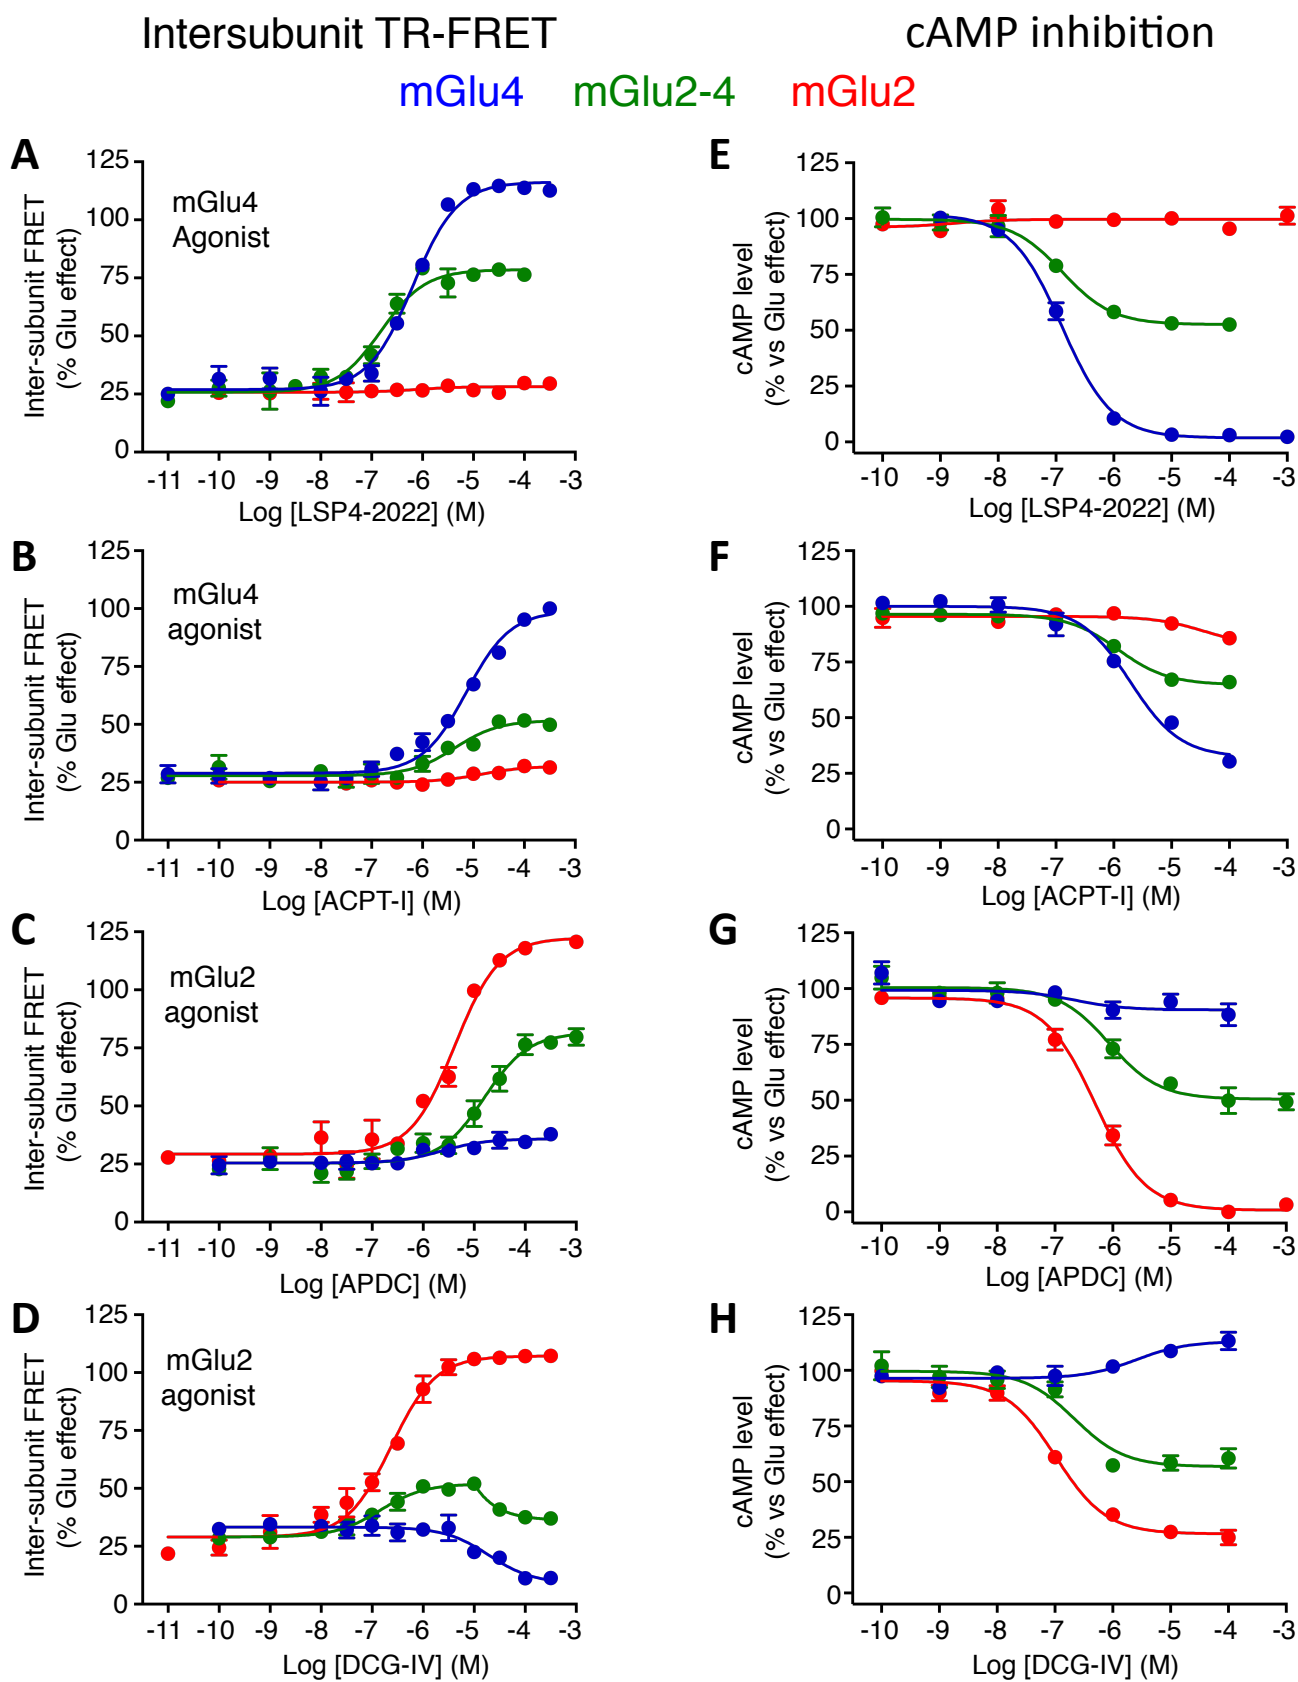

Figure 1-figure supplement 2 .

Supplement: supp [file elife-25233-supp-v1.zip]

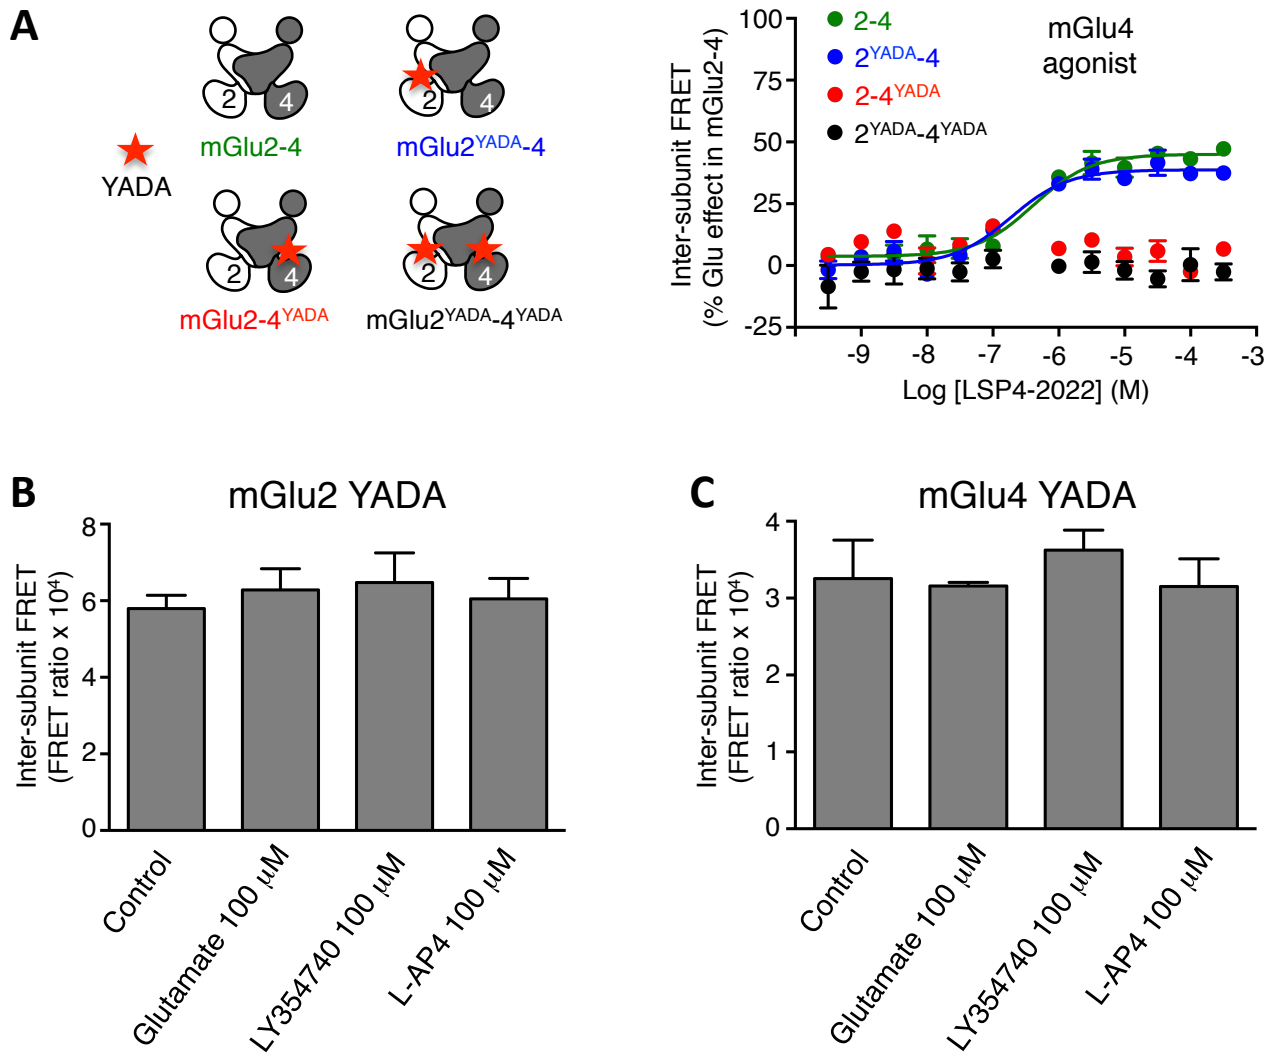

Figure 2-figure supplement 1.

Supplement: supp [file elife-25233-supp-v1.zip]

## Intersubunit TR-FRET - transfected in STHdH cells

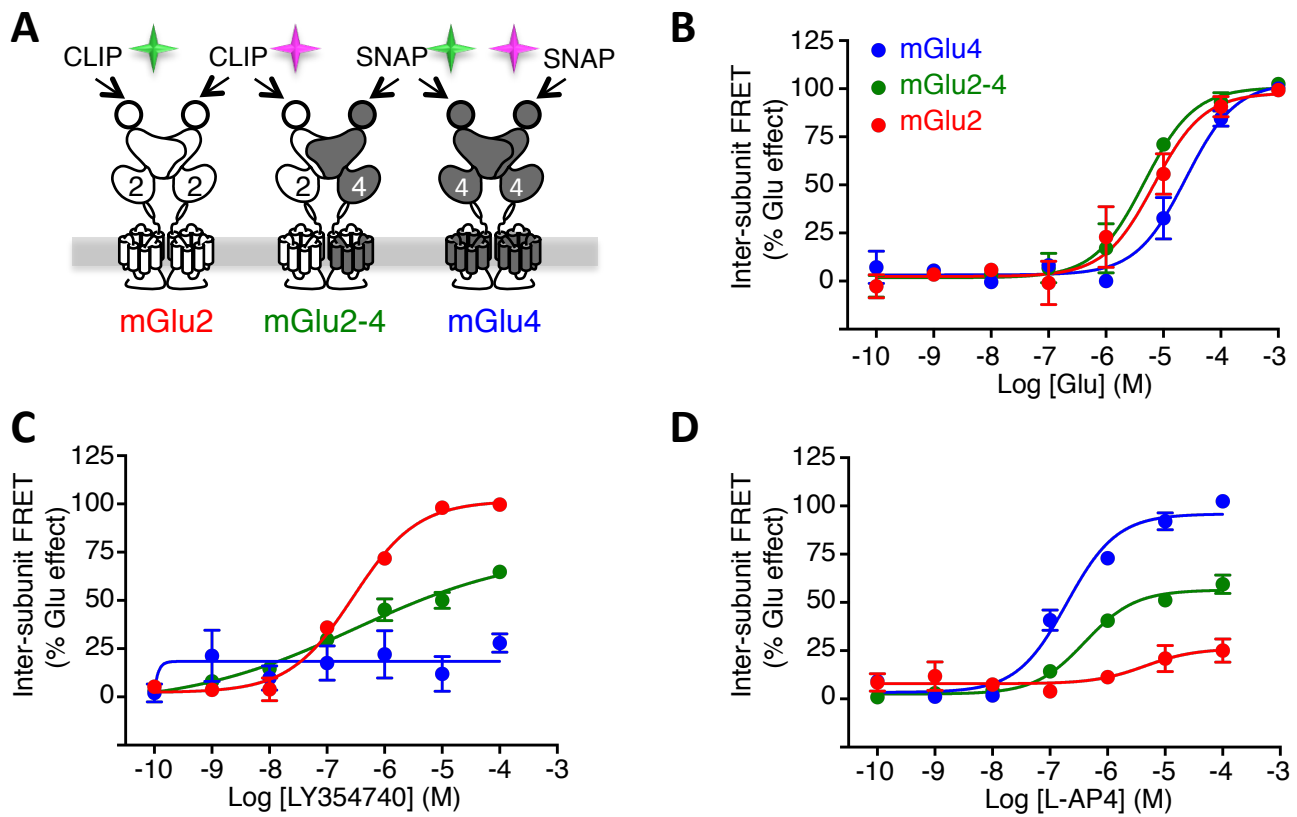

Figure 6-figure supplement 1.

Supplement: supp [file elife-25233-supp-v1.zip]

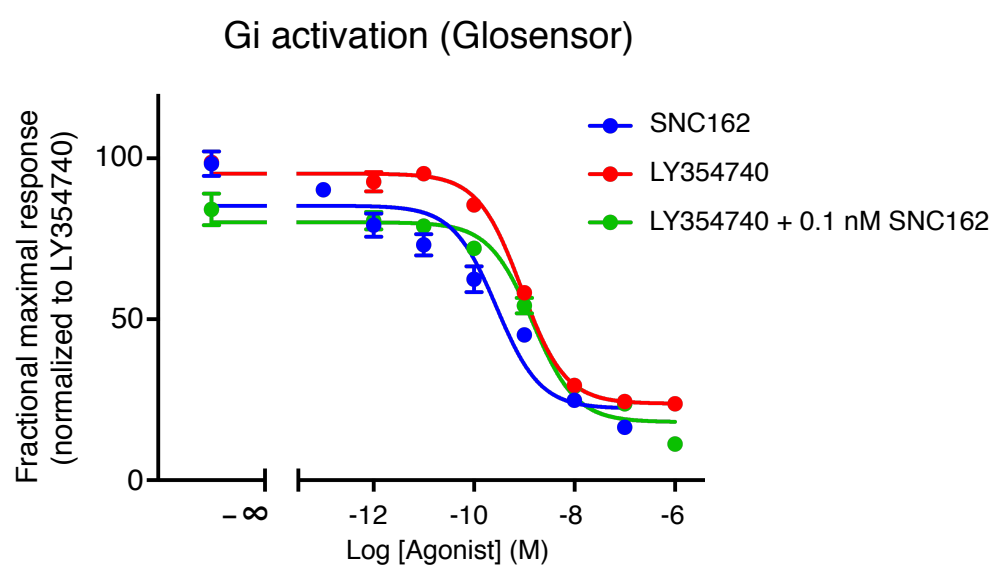

Figure 7-figure supplement 1.

Supplement: supp [file elife-25233-supp-v1.zip]

## Intersubunit TR-FRET

**A**

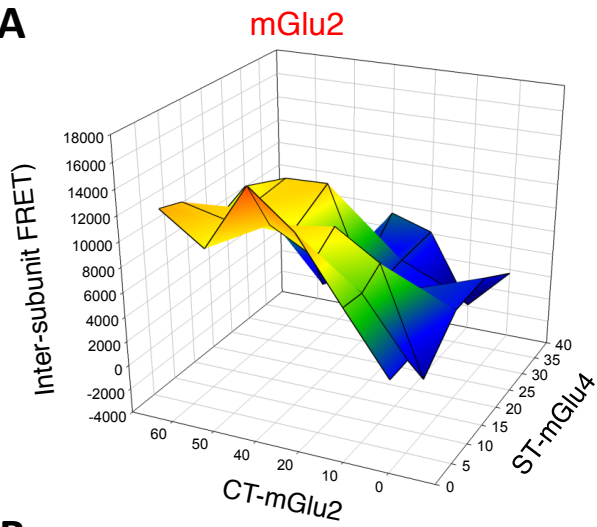

**B**

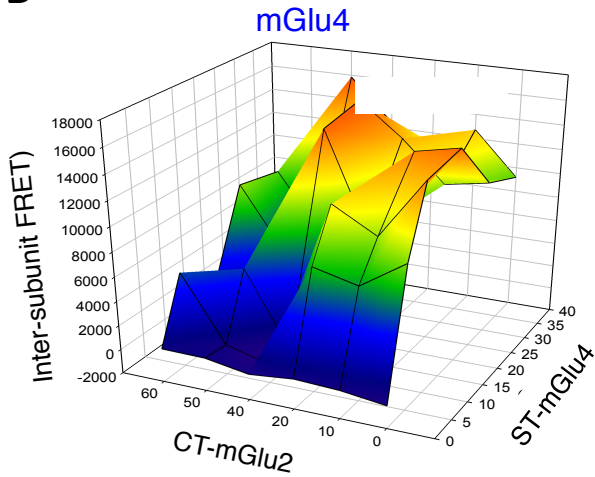

**C**

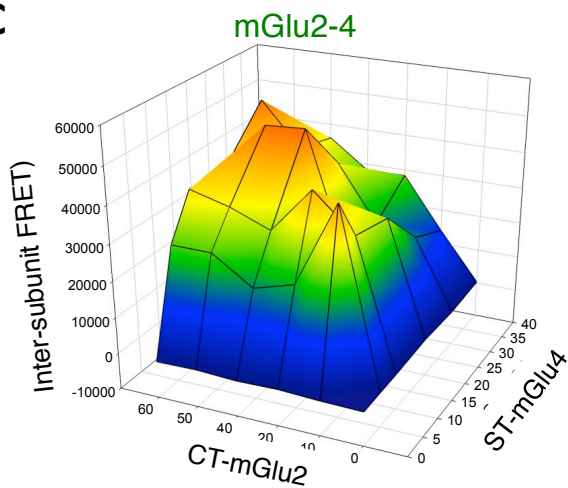

## GCaMP6s calcium sensor

**D**

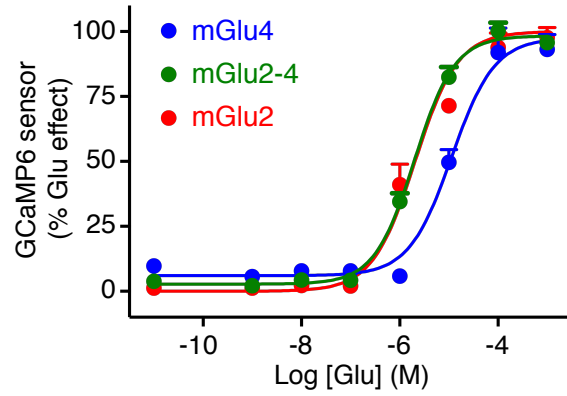

**E**

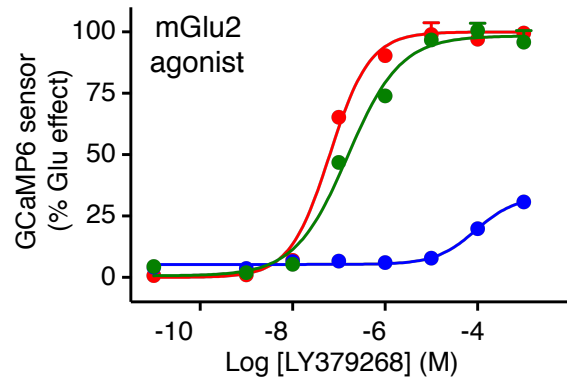

**F**

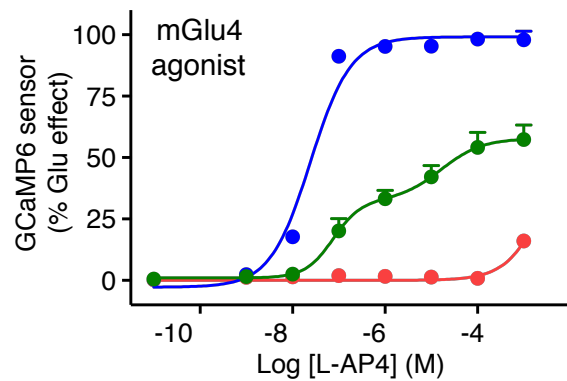

Figure 1-figure supplement 1

Supplement: supp [file elife-25233-supp-v1.zip]

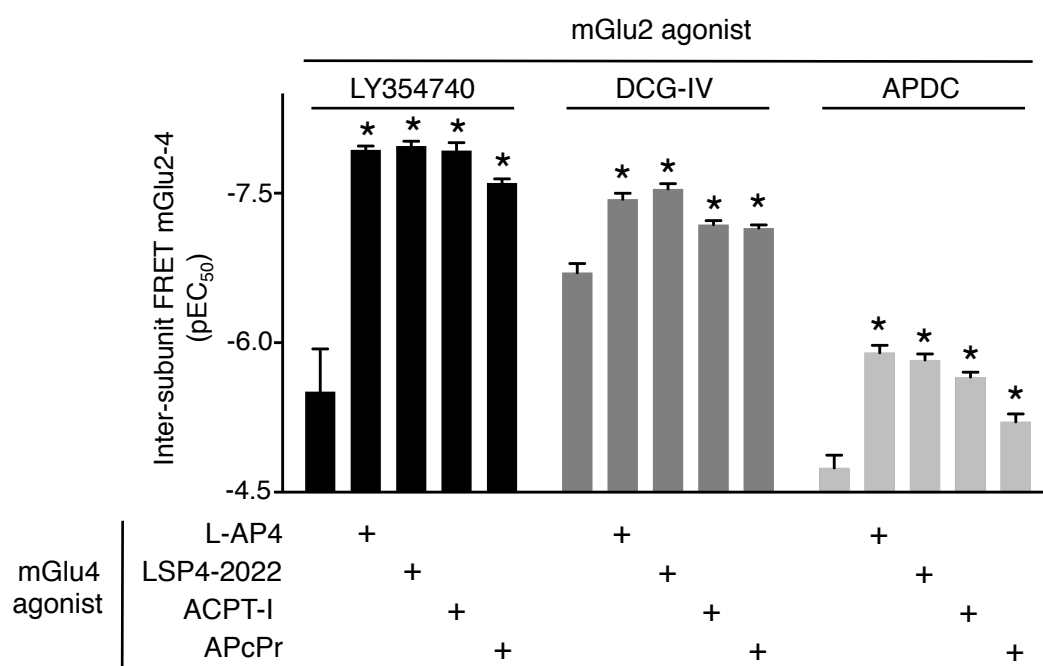

Figure 3-figure supplement 1.

Supplement: supp [file elife-25233-supp-v1.zip]
